# Supplementary material for: Temporal profile of serum neurofilament light in multiple sclerosis: Implications for patient monitoring
Source: PubMed Central journal article supplement — Mult Scler. 2020 Dec 14;27(10):1497–505. doi: 10.1177/1352458520972573 (PMC8414824; doi:10.1177/1352458520972573), 2020-12-14
Supplement: sj-pdf-1-msj-10.1177_1352458520972573.pdf [file sj-pdf-1-msj-10.1177_1352458520972573.pdf]

**Supplemental Material Table 1** Univariate and multivariate analyses: T2 lesions on MRI at 4 years

| Variable label                                     | Level                                           | Univariate analysis        |          | Multivariate analysis      |          |
|----------------------------------------------------|-------------------------------------------------|----------------------------|----------|----------------------------|----------|
|                                                    |                                                 | Estimate (95% CI)          | <i>p</i> | Estimate (95% CI)          | <i>p</i> |
| Intercept                                          |                                                 |                            |          | 1.9386 (1.2975, 2.5797)    | <0.0001  |
| sNfL at baseline<br>(log-transformed)              |                                                 | 0.8870 (0.6659, 1.1082)    | <0.0001  | 0.7341 (0.5063, 0.9620)    | <0.0001  |
| Treatment arm                                      | Peginterferon beta-1a 125 µg every 2 or 4 weeks | -0.3761 (-0.6035, -0.1488) | 0.0012   | -0.5490 (-0.7912, -0.3068) | <0.0001  |
|                                                    | Placebo                                         | Reference                  |          | Reference                  |          |
| Age at reference start date, years                 |                                                 | -0.0491 (-0.0589, -0.0393) | <0.0001  | -0.0370 (-0.0502, -0.0239) | <0.0001  |
| Sex                                                | Female                                          | 0.0772 (-0.1628, 0.3172)   | 0.5284   |                            |          |
|                                                    | Male                                            | Reference                  |          |                            |          |
| EDSS score at baseline                             |                                                 | -0.2417 (-0.3348, -0.1487) | <0.0001  |                            |          |
| MSFC score at baseline                             |                                                 | 0.2009 (0.0366, 0.3652)    | 0.0165   | 0.5360 (0.3224, 0.7496)    | <0.0001  |
| Number of relapses 3 years prior to study          |                                                 | 0.1106 (-0.0191, 0.2402)   | 0.0948   |                            |          |
| Onset year of symptoms                             |                                                 | -0.0553 (-0.0714, -0.0393) | <0.0001  | -0.0365 (-0.0559, -0.0171) | 0.0002   |
| Gd+ lesions at baseline                            |                                                 | 0.1487 (0.1084, 0.1890)    | <0.0001  |                            |          |
| Volume of T2 lesions at baseline (log-transformed) |                                                 | 0.3837 (0.3038, 0.4636)    | <0.0001  | 0.3904 (0.2788, 0.5020)    | <0.0001  |
| Dispersion                                         |                                                 |                            |          | 1.7189 (1.5036, 1.9651)    |          |

CI: confidence interval; EDSS: Expanded Disability Status Scale; Gd+: gadolinium enhancing; MSFC: Multiple Sclerosis Functional Composite; sNfL: serum neurofilament light chain.

**Supplemental Material Table 2** Univariate and multivariate analyses: Percent brain volume change at 4 years

| Variable label                                     | Level                                           | Univariate analysis        |          | Multivariate analysis      |          |
|----------------------------------------------------|-------------------------------------------------|----------------------------|----------|----------------------------|----------|
|                                                    |                                                 | Estimate (95% CI)          | <i>p</i> | Estimate (95% CI)          | <i>p</i> |
| Intercept                                          |                                                 |                            |          | 0.5943 (−0.0943, 1.2828)   | 0.0905   |
| sNfL at baseline (log-transformed)                 |                                                 | −0.8757 (−1.0632, −0.6882) | <0.0001  | −0.5785 (−0.7820, −0.3750) | <0.0001  |
| Treatment arm                                      | Peginterferon beta-1a 125 µg every 2 or 4 weeks | 0.0268 (−0.1972, 0.2509)   | 0.8      | −0.0767 (−0.3176, 0.1642)  | 0.5319   |
|                                                    | Placebo                                         | Reference                  |          | Reference                  |          |
| Age at reference start date, years                 |                                                 | −0.0002 (−0.0111, 0.0107)  | 0.9755   | −0.0149 (−0.0285, −0.0014) | 0.0304   |
| Sex                                                | Female                                          | 0.0766 (−0.1592, 0.3124)   | 0.5237   |                            |          |
|                                                    | Male                                            | Reference                  |          |                            |          |
| EDSS score at baseline                             |                                                 | −0.1685 (−0.2578, −0.0792) | 0.0002   | −0.1194 (−0.2314, −0.0074) | 0.0367   |
| MSFC score at baseline                             |                                                 | 0.2902 (0.1416, 0.4388)    | 0.0001   |                            |          |
| Number of relapses 3 years prior to study          |                                                 | −0.1222 (−0.2446, 0.0003)  | 0.0506   |                            |          |
| Onset year of symptoms                             |                                                 | 0.0149 (−0.0023, 0.0321)   | 0.0898   | 0.0338 (0.0128, 0.0548)    | 0.0017   |
| Gd+ lesions at Baseline                            |                                                 | −0.0859 (−0.1077, −0.0641) | <0.0001  |                            |          |
| Volume of T2 lesions at baseline (log-transformed) |                                                 | −0.3641 (−0.4327, −0.2955) | <0.0001  | −0.2929 (−0.3946, −0.1913) | <0.0001  |

CI: confidence interval; EDSS: Expanded Disability Status Scale; Gd+: gadolinium enhancing; MSFC: Multiple Sclerosis Functional Composite; sNfL: serum neurofilament light chain.

**Supplemental Material Table 3** Univariate and multivariate analyses: EDSS score at 4 years

| Variable label                                        | Level                                                  | Univariate analysis        |          | Multivariate analysis      |          |
|-------------------------------------------------------|--------------------------------------------------------|----------------------------|----------|----------------------------|----------|
|                                                       |                                                        | Estimate (95% CI)          | <i>p</i> | Estimate (95% CI)          | <i>p</i> |
| Intercept                                             |                                                        |                            |          | −0.3828 (−0.7824, 0.0167)  | 0.0603   |
| sNfL at baseline<br>(log-transformed)                 |                                                        | 0.1479 (0.0404, 0.2555)    | 0.0071   | 0.1137 (−0.0036, 0.2310)   | 0.0574   |
| Treatment arm                                         | Peginterferon beta-<br>1a 125 µg every 2<br>or 4 weeks | −0.0503 (−0.1673, 0.0667)  | 0.399    | −0.0692 (−0.2083, 0.0699)  | 0.3290   |
|                                                       | Placebo                                                | Reference                  |          | Reference                  |          |
| Age at reference start date, years                    |                                                        | 0.0050 (−0.0007, 0.0106)   | 0.0843   | 0.0121 (0.0048, 0.0195)    | 0.0012   |
| Sex                                                   | Female                                                 | 0.0734 (−0.0483, 0.1952)   | 0.2369   |                            |          |
|                                                       | Male                                                   | Reference                  |          |                            |          |
| EDSS score at baseline                                |                                                        | −0.0890 (−0.1347, −0.0433) | 0.0001   | −0.1300 (−0.1926, −0.0674) | <0.0001  |
| MSFC score at baseline                                |                                                        | −0.0612 (−0.1405, 0.0181)  | 0.1301   |                            |          |
| Number of relapses 3 years prior<br>to study          |                                                        | 0.0461 (−0.0193, 0.1115)   | 0.1666   |                            |          |
| Onset year of symptoms                                |                                                        | 0.0037 (−0.0049, 0.0124)   | 0.3982   |                            |          |
| Gd+ lesions at baseline                               |                                                        | 0.0202 (0.0077, 0.0327)    | 0.0016   |                            |          |
| Volume of T2 lesions at baseline<br>(log-transformed) |                                                        | 0.0592 (0.0210, 0.0975)    | 0.0025   | 0.0618 (0.0049, 0.1188)    | 0.0334   |

CI: confidence interval; EDSS: Expanded Disability Status Scale; Gd+: gadolinium enhancing; MSFC: Multiple Sclerosis Functional Composite; sNfL: serum neurofilament light chain.

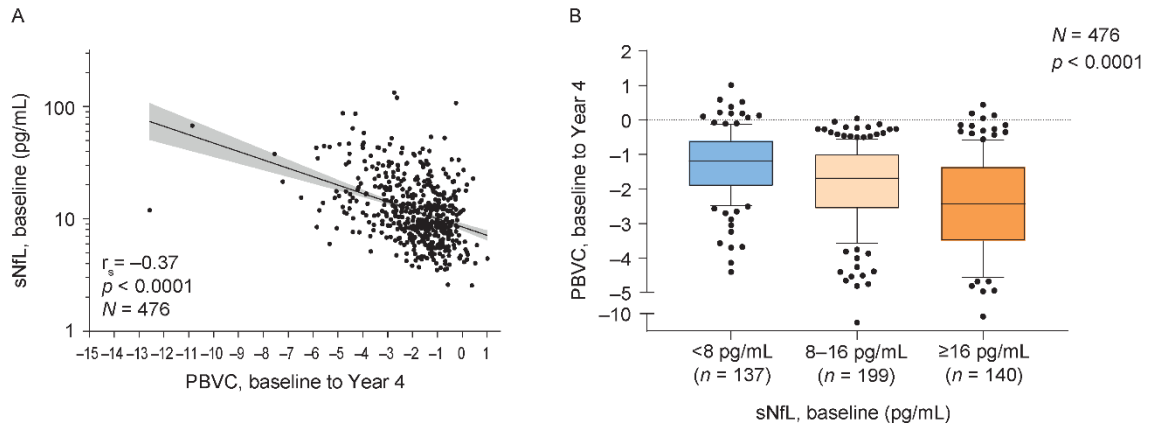

**Supplemental Material Figure 1.** Spearman correlation between sNfL level at baseline and PBVC over 4 years. (a) Correlation shown as a scatterplot with the 95% confidence interval represented with gray shading. (b) Correlation shown as a box plot with whiskers and outliers based on sNfL tertiles. PBVC: percent brain volume change; sNfL: serum neurofilament light chain.

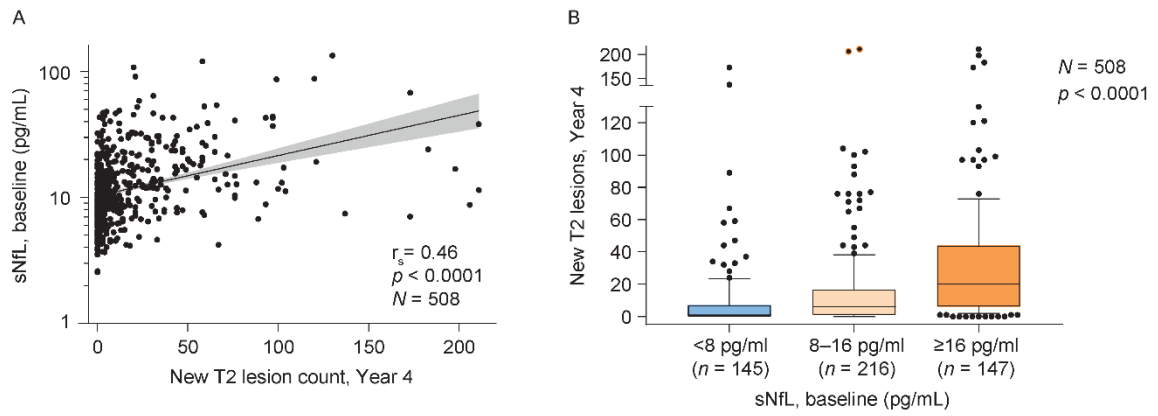

**Supplemental Material Figure 2.** Spearman correlation between sNfL level at baseline and new T2 lesion count at Year 4. (a) Correlation shown as a scatterplot with the 95% confidence interval represented with gray shading. (b) Correlation shown as a box plot with whiskers and outliers based on sNfL tertiles. sNfL: serum neurofilament light chain.
